# Supplementary material for: Low Prevalence of Leptospira Carriage in Rodents in Leptospirosis-Endemic Northeastern Thailand
Source: MDPI journal article supplement (doi:10.3390/tropicalmed5040154), 2020-09-30
Supplement: s1 [file s1]

**Table S1: GenBank accession numbers of the reference *rrs* gene and 19 of the 443- nucleotide *rrs* of rodent samples from this study used for phylogenetic analysis**

| ID                   | Host                   | Species                  | Serovar       | Strain        | Country          | GenBank ID   | Sources   |
|----------------------|------------------------|--------------------------|---------------|---------------|------------------|--------------|-----------|
| Leptonema_NR043139   | cow                    | <i>Leptonema illini</i>  | Illini        | 3055          | USA              | NR043139     | reference |
| Turneriella_AY293856 | bacteriological medium | <i>Turneriella parva</i> | Parva         | H             | England          | AY293856     | reference |
| Turneriella_AY398688 | porcine uterus         | <i>Turneriella parva</i> | Parva         | S-308-81      | Northern Ireland | AY398688     | reference |
| adle_MK688976        | unknown                | <i>L. adleri</i>         | unknown       | CES           | Colombia         | MK688976     | reference |
| alex_AY631880        | human                  | <i>L. alexanderi</i>     | Manhao        | L60           | China            | AY631880     | reference |
| alex_AY996803        | human                  | <i>L. alexanderi</i>     | Manzhuang     | A 23          | China            | AY996803     | reference |
| alex_DQ991481        | human                  | <i>L. alexanderi</i>     | Mengla        | A 85          | China            | DQ991481     | reference |
| alex_AY996804        | human                  | <i>L. alexanderi</i>     | Nanding       | M 6901        | China            | AY996804     | reference |
| alst_AY631881        | frog                   | <i>L. alstonii</i>       | Sichuan       | 79601         | China            | AY631881     | reference |
| bara_MK791625        | unknown                | <i>L. barantonii</i>     | unknown       | CES           | Colombia         | MK791625     | reference |
| borg_EF537005        | human                  | <i>L. borgpetersenii</i> | Javanica      | L0066         | Thailand         | EF537005     | reference |
| borg_EF537006        | human                  | <i>L. borgpetersenii</i> | Javanica      | L0864         | Thailand         | EF537006     | reference |
| borg_AM050573        | human                  | <i>L. borgpetersenii</i> | Mini          | Sari          | Italy            | AM050573     | reference |
| borg_JQ906666        | human                  | <i>L. borgpetersenii</i> | Undesignated  | UI09149       | Laos             | JQ906666     | reference |
| borg_JQ906665        | human                  | <i>L. borgpetersenii</i> | Undesignated  | UI09931       | Laos             | JQ906665     | reference |
| borg_JQ906669        | mouse                  | <i>L. borgpetersenii</i> | Undesignated  | MC-OW08-2     | Japan            | JQ906669     | reference |
| borg_JQ906662        | rat                    | <i>L. borgpetersenii</i> | Undesignated  | RR-KS-KC08-2B | Japan            | JQ906662     | reference |
| borg_JQ906663        | rat                    | <i>L. borgpetersenii</i> | Undesignated  | RR-OW05-45    | Japan            | JQ906663     | reference |
| borg_JQ906664        | rat                    | <i>L. borgpetersenii</i> | Undesignated  | RR-OW-MY10-12 | Japan            | JQ906664     | reference |
| borg_JQ906667        | shrew                  | <i>L. borgpetersenii</i> | Undesignated  | SU-HO11-5F3   | Japan            | JQ906667     | reference |
| borg_JQ906668        | shrew                  | <i>L. borgpetersenii</i> | Undesignated  | SU-HO11-9F3   | Japan            | JQ906668     | reference |
| dzia_MN060986        | unknown                | <i>L. dzianensis</i>     | unknown       | CES           | Colombia         | MN060986     | reference |
| elll_NPEH01000112    | hamster                | <i>L. ellisii</i>        | unknown       | ATI7-C-A3     | New Caledonia    | NPEH01000112 | reference |
| elll_NPEF01000404    | unknown                | <i>L. ellisii</i>        | unknown       | ATI7-C-A5     | New Caledonia    | NPEF01000404 | reference |
| inte_JQ906637        | rat                    | <i>L. interrogans</i>    | Australis     | 9116          | China            | JQ906637     | reference |
| inte_EF536978        | human                  | <i>L. interrogans</i>    | Autumnalis    | L0013         | Thailand         | EF536978     | reference |
| inte_EF536983        | human                  | <i>L. interrogans</i>    | Autumnalis    | L0594         | Thailand         | EF536983     | reference |
| inte_EF536976        | human                  | <i>L. interrogans</i>    | Autumnalis    | LP101         | Thailand         | EF536976     | reference |
| inte_EF536979        | human                  | <i>L. interrogans</i>    | Autumnalis    | RY021         | Thailand         | EF536979     | reference |
| inte_EF536985        | human                  | <i>L. interrogans</i>    | Bataviae      | L1111         | Thailand         | EF536985     | reference |
| inte_EF536994        | human                  | <i>L. interrogans</i>    | Bataviae      | L1178         | Thailand         | EF536994     | reference |
| inte_JQ906622        | human                  | <i>L. interrogans</i>    | Bataviae      | UI08561       | Laos             | JQ906622     | reference |
| inte_EF536993        | human                  | <i>L. interrogans</i>    | Bataviae      | UT075         | Thailand         | EF536993     | reference |
| inte_EF536987        | human                  | <i>L. interrogans</i>    | Bataviae      | UT229         | Thailand         | EF536987     | reference |
| inte_JQ906634        | human                  | <i>L. interrogans</i>    | Fortbragg     | 9078          | China            | JQ906634     | reference |
| inte_EF536975        | human                  | <i>L. interrogans</i>    | Grippytyphosa | L1006         | Thailand         | EF536975     | reference |
| inte_JQ906621        | human                  | <i>L. interrogans</i>    | Grippytyphosa | UI08368       | Laos             | JQ906621     | reference |
| inte_JQ906696        | human                  | <i>L. interrogans</i>    | Grippytyphosa | UI08381       | Laos             | JQ906696     | reference |
| inte_JQ906625        | human                  | <i>L. interrogans</i>    | Grippytyphosa | UI08434       | Laos             | JQ906625     | reference |

|               |        |                       |               |            |           |          |           |
|---------------|--------|-----------------------|---------------|------------|-----------|----------|-----------|
| inte_JQ906628 | human  | <i>L. interrogans</i> | Grippytyphosa | UI12764    | Laos      | JQ906628 | reference |
| inte_JQ906629 | human  | <i>L. interrogans</i> | Grippytyphosa | UI12769    | Laos      | JQ906629 | reference |
| inte_JQ906633 | human  | <i>L. interrogans</i> | Hebdomadis    | 9073       | China     | JQ906633 | reference |
| inte_FJ154564 | human  | <i>L. interrogans</i> | Kremastos     | Kremastos  | Australia | FJ154564 | reference |
| inte_JQ906636 | human  | <i>L. interrogans</i> | Linhai        | 9087       | China     | JQ906636 | reference |
| inte_JQ906635 | human  | <i>L. interrogans</i> | Nanla         | 9188       | China     | JQ906635 | reference |
| inte_EF536981 | human  | <i>L. interrogans</i> | Pomona        | UT364      | Thailand  | EF536981 | reference |
| inte_EF536990 | human  | <i>L. interrogans</i> | Pyrogenes     | L0374      | Thailand  | EF536990 | reference |
| inte_EF536991 | human  | <i>L. interrogans</i> | Pyrogenes     | L0387      | Thailand  | EF536991 | reference |
| inte_JQ906619 | human  | <i>L. interrogans</i> | Pyrogenes     | R205       | Sri Lanka | JQ906619 | reference |
| inte_EF536980 | human  | <i>L. interrogans</i> | Pyrogenes     | UD009      | Thailand  | EF536980 | reference |
| inte_JQ906647 | canine | <i>L. interrogans</i> | Undesignated  | D-FO11-11K | Japan     | JQ906647 | reference |
| inte_JQ906645 | canine | <i>L. interrogans</i> | Undesignated  | D-MZ07-2E  | Japan     | JQ906645 | reference |
| inte_JQ906646 | canine | <i>L. interrogans</i> | Undesignated  | D-MZ07-6E  | Japan     | JQ906646 | reference |
| inte_JQ906644 | frog   | <i>L. interrogans</i> | Undesignated  | Shuang4    | China     | JQ906644 | reference |
| inte_JQ906631 | human  | <i>L. interrogans</i> | Undesignated  | 7751       | China     | JQ906631 | reference |
| inte_JQ906651 | human  | <i>L. interrogans</i> | Undesignated  | 9086       | China     | JQ906651 | reference |
| inte_JQ906638 | human  | <i>L. interrogans</i> | Undesignated  | 81522      | China     | JQ906638 | reference |
| inte_JQ906632 | human  | <i>L. interrogans</i> | Undesignated  | 200040     | China     | JQ906632 | reference |
| inte_JQ906639 | human  | <i>L. interrogans</i> | Undesignated  | 200305     | China     | JQ906639 | reference |
| inte_EF536986 | human  | <i>L. interrogans</i> | Undesignated  | FPW1024    | Thailand  | EF536986 | reference |
| inte_EF536989 | human  | <i>L. interrogans</i> | Undesignated  | FPW2026    | Thailand  | EF536989 | reference |
| inte_JQ906641 | human  | <i>L. interrogans</i> | Undesignated  | J39        | China     | JQ906641 | reference |
| inte_JQ906642 | human  | <i>L. interrogans</i> | Undesignated  | J42        | China     | JQ906642 | reference |
| inte_EF536984 | human  | <i>L. interrogans</i> | Undesignated  | L1085      | Thailand  | EF536984 | reference |
| inte_JQ906655 | human  | <i>L. interrogans</i> | Undesignated  | NIID10     | Malaysia  | JQ906655 | reference |
| inte_JQ906654 | human  | <i>L. interrogans</i> | Undesignated  | NIID9      | Malaysia  | JQ906654 | reference |
| inte_JQ906618 | human  | <i>L. interrogans</i> | Undesignated  | R163       | Sri Lanka | JQ906618 | reference |
| inte_JQ906620 | human  | <i>L. interrogans</i> | Undesignated  | R437       | Sri Lanka | JQ906620 | reference |
| inte_JQ906623 | human  | <i>L. interrogans</i> | Undesignated  | R499       | Sri Lanka | JQ906623 | reference |
| inte_JQ906624 | human  | <i>L. interrogans</i> | Undesignated  | UI08440    | Laos      | JQ906624 | reference |
| inte_JQ906626 | human  | <i>L. interrogans</i> | Undesignated  | UI12621    | Laos      | JQ906626 | reference |
| inte_JQ906627 | human  | <i>L. interrogans</i> | Undesignated  | UI12758    | Laos      | JQ906627 | reference |
| inte_JQ906630 | human  | <i>L. interrogans</i> | Undesignated  | UI13372    | Laos      | JQ906630 | reference |
| inte_EF536988 | human  | <i>L. interrogans</i> | Undesignated  | UT053      | Thailand  | EF536988 | reference |
| inte_EF536982 | human  | <i>L. interrogans</i> | Undesignated  | UT126      | Thailand  | EF536982 | reference |
| inte_JQ906640 | mouse  | <i>L. interrogans</i> | Undesignated  | 200509     | China     | JQ906640 | reference |
| inte_JQ906617 | mouse  | <i>L. interrogans</i> | Undesignated  | A05D31     | China     | JQ906617 | reference |
| inte_JQ906616 | mouse  | <i>L. interrogans</i> | Undesignated  | A05D39     | China     | JQ906616 | reference |
| inte_JQ906653 | mouse  | <i>L. interrogans</i> | Undesignated  | As-AK09-25 | Japan     | JQ906653 | reference |
| inte_JQ906648 | mouse  | <i>L. interrogans</i> | Undesignated  | H0728      | China     | JQ906648 | reference |
| inte_JQ906649 | mouse  | <i>L. interrogans</i> | Undesignated  | H0754      | China     | JQ906649 | reference |

|                   |                             |                          |               |             |             |              |           |
|-------------------|-----------------------------|--------------------------|---------------|-------------|-------------|--------------|-----------|
| inte_JQ906650     | mouse                       | <i>L. interrogans</i>    | Undesignated  | H0775       | China       | JQ906650     | reference |
| inte_JQ906656     | rat                         | <i>L. interrogans</i>    | Undesignated  | E93         | Philippines | JQ906656     | reference |
| inte_JQ906652     | rat                         | <i>L. interrogans</i>    | Undesignated  | J109        | China       | JQ906652     | reference |
| inte_JQ906643     | rat                         | <i>L. interrogans</i>    | Undesignated  | J7          | China       | JQ906643     | reference |
| inte_JQ906657     | rat                         | <i>L. interrogans</i>    | Undesignated  | K1-5        | Philippines | JQ906657     | reference |
| kirs_EF536995     | human                       | <i>L. kirschneri</i>     | Grippytyphosa | Moskva V    | Russia      | EF536995     | reference |
| kirs_EF536997     | human                       | <i>L. kirschneri</i>     | Grippytyphosa | UT130       | Thailand    | EF536997     | reference |
| kirs_FJ154573     | human                       | <i>L. kirschneri</i>     | Ramisi        | Musa        | Kenya       | FJ154573     | reference |
| kirs_EF536996     | human                       | <i>L. kirschneri</i>     | Undesignated  | H1          | Thailand    | EF536996     | reference |
| kirs_EF536998     | human                       | <i>L. kirschneri</i>     | Undesignated  | H2          | Thailand    | EF536998     | reference |
| kirs_JQ906658     | shrew                       | <i>L. kirschneri</i>     | Undesignated  | SU-HO11-5F5 | Japan       | JQ906658     | reference |
| kirs_JQ906659     | shrew                       | <i>L. kirschneri</i>     | Undesignated  | SU-HO11-7F1 | Japan       | JQ906659     | reference |
| kmet_AB279549     | soil                        | <i>L. kmetzi</i>         | Malaysia      | Bejo-Iso9   | Malaysia    | AB279549     | reference |
| mayo_NR_134067    | human                       | <i>L. mayottensis</i>    | unknown       | 200901116   | Mayotte     | NR134067     | reference |
| nogu_EU349495     | human                       | <i>L. noguchii</i>       | Cascata       | Cascata     | Brazil      | EU349495     | reference |
| nogu_FJ154588     | coypu                       | <i>L. noguchii</i>       | Orleans       | LSU 2580    | USA         | FJ154588     | reference |
| nogu_FJ154582     | opssum                      | <i>L. noguchii</i>       | Panama        | CZ 214 K    | Panama      | FJ154582     | reference |
| putr_MN062724     | unknown                     | <i>L. putramalaysiae</i> | unknown       | CES         | unknown     | MN062724     | reference |
| sant_AY996805     | raccoon                     | <i>L. santarosai</i>     | Georgia       | LT 117      | USA         | AY996805     | reference |
| sant_FJ154576     | rat                         | <i>L. santarosai</i>     | Shermani      | 1342 K      | Panama      | FJ154576     | reference |
| sant_ZZ1649.1     | rat                         | <i>L. santarosai</i>     | Shermani      | 1342 K      | Panama      | ZZ1649.1     | reference |
| sant_AY631883     | unknown                     | <i>L. santarosai</i>     | Shermani      | LT 821      | unknown     | AY631883     | reference |
| tipp_CP015217     | greater white-toothed shrew | <i>L. tipperaryensis</i> | unknown       | GWTS #1     | Ireland     | CP015217     | reference |
| tipp_CP015217     | greater white-toothed shrew | <i>L. tipperaryensis</i> | unknown       | GWTS #1     | Ireland     | CP015217     | reference |
| weil_DQ483058     | bovine                      | <i>L. weilii</i>         | Topaz         | 94-79970/3  | Australia   | DQ483058     | reference |
| weil_JQ906671     | human                       | <i>L. weilii</i>         | Undesignated  | LNT1194     | Laos        | JQ906671     | reference |
| weil_JQ906670     | human                       | <i>L. weilii</i>         | Undesignated  | LNT1234     | Laos        | JQ906670     | reference |
| weil_JQ906673     | human                       | <i>L. weilii</i>         | Undesignated  | UI13098     | Laos        | JQ906673     | reference |
| weil_JQ906672     | human                       | <i>L. weilii</i>         | Undesignated  | UI14631     | Laos        | JQ906672     | reference |
| weil_FJ154590     | human                       | <i>L. weilii</i>         | Vughia        | LT 89-68    | Vietnam     | FJ154590     | reference |
| novel_JX857402    | water                       | Undesignated             | Undesignated  | NP-29-Q1    | Thailand    | JX857402     | reference |
| novel_JX857403    | water                       | Undesignated             | Undesignated  | NP-29-Q3    | Thailand    | JX857403     | reference |
| stim_QHCS01000002 | water                       | <i>L. stimsonii</i>      | unknown       | AMB6-RJ     | Brazil      | QHCS01000002 | reference |
| stim_QHCT01000027 | water                       | <i>L. stimsonii</i>      | unknown       | Yale        | USA         | QHCT01000027 | reference |
| yasu_QHCR01000024 | soil                        | <i>L. yasudae</i>        | unknown       | B21         | Brazil      | QHCR01000024 | reference |
| yasu_QHCU01000018 | soil                        | <i>L. yasudae</i>        | unknown       | F1          | Brazil      | QHCU01000018 | reference |
| broo_AY792329     | human                       | <i>L. broomii</i>        | Undesignated  | L065        | Denmark     | AY792329     | reference |
| fain_AY631885     | pig                         | <i>L. fainei</i>         | Hurstbridge   | BUT 6       | Australia   | AY631885     | reference |
| fain_U60594       | human                       | <i>L. fainei</i>         | Undesignated  | Hurstbridge | Australia   | U60594       | reference |
| inad_AY631891     | opssum                      | <i>L. inadai</i>         | Aguaruna      | MW 4        | Peru        | AY631891     | reference |
| john_LC196061     | soil                        | <i>L. johnsonii</i>      | unknown       | E8          | Japan       | LC196061     | reference |
| lice_JX857400     | water                       | <i>L. licerasiae</i>     | Undesignated  | NP-21-Q103  | Thailand    | JX857400     | reference |

|                       |                          |                          |              |                  |                 |          |               |
|-----------------------|--------------------------|--------------------------|--------------|------------------|-----------------|----------|---------------|
| lice_JX857396         | water                    | <i>L. licerasiae</i>     | Undesignated | NP-46-Q127       | Thailand        | JX857396 | reference     |
| lice_EF612280         | <i>Rattus norvegicus</i> | <i>L. licerasiae</i>     | Varillal     | CEH033           | Peru            | EF612280 | reference     |
| sain_MN047234         | soil                     | <i>L. saintgrionsiae</i> | unknown      | CES              | unknown         | MN047234 | reference     |
| sari_MN062730         | environmental sample     | <i>L. sarikeiensis</i>   | unknown      | CES              | unknown         | MN062730 | reference     |
| sela_MN062732         | water                    | <i>L. selangorensis</i>  | unknown      | CES              | unknown         | MN062732 | reference     |
| vene_MK688379         | human                    | <i>L. venezuelensis</i>  | unknown      | CES              | Columbia        | MK688379 | reference     |
| wolf_EF025496         | human                    | <i>L. wolffii</i>        | Khorat       | Khorat-H2        | Thailand        | EF025496 | reference     |
| wolf_JX857397         | water                    | <i>L. wolffii</i>        | Undesignated | NP-49-Q74        | Thailand        | JX857397 | reference     |
| wolf_JX857398         | water                    | <i>L. wolffii</i>        | Undesignated | NP-63-Q40        | Thailand        | JX857398 | reference     |
| novel_JX857401        | water                    | Undesignated             | Undesignated | NP-30-Q29        | Thailand        | JX857401 | reference     |
| novel_JX857408        | water                    | Undesignated             | Undesignated | NP-30-Q61        | Thailand        | JX857408 | reference     |
| novel_JX857399        | water                    | Undesignated             | Undesignated | NP-64-Q41        | Thailand        | JX857399 | reference     |
| bifl_FJ154577         | human                    | <i>L. biflexa</i>        | Andamana     | CH 11            | Andaman Islands | FJ154577 | reference     |
| meve_AY631889         | unknown                  | <i>L. meyeri</i>         | Hardjo       | Went5            | Canada          | AY631889 | reference     |
| meve_AY631878         | frog                     | <i>L. meyeri</i>         | Ranarum      | Iowa City Frog   | USA             | AY631878 | reference     |
| meve_AY631892         | rat                      | <i>L. meyeri</i>         | Samaranga    | Veldrat Samarang | Indonesia       | AY631892 | reference     |
| terp_AY631888         | unknown                  | <i>L. terpstrae</i>      | Hualin       | LT 11-33         | China           | AY631888 | reference     |
| vant_AY631897         | water                    | <i>L. vanthielii</i>     | Holland      | WaZ Holland      | Netherlands     | AY631897 | reference     |
| wolb_AY631890         | water                    | <i>L. wolbachii</i>      | Gent         | Wa Gent          | Belgium         | AY631890 | reference     |
| yana_AY631882         | water                    | <i>L. yanagatae</i>      | Saopaulo     | Sao Paulo        | Brazil          | AY631882 | reference     |
| unculturable_FJ820401 | environmental sample     | Undesignated             | Undesignated | S0060            | China           | FJ820401 | reference     |
| unculturable_JX857331 | water                    | Undesignated             | Undesignated | DM18             | Thailand        | JX857331 | reference     |
| unculturable_JX857395 | water                    | Undesignated             | Undesignated | NP78             | Thailand        | JX857395 | reference     |
| BRR0079               | <i>Rattus exulans</i>    | <i>L. borgpetersenii</i> | Undesignated | BRR0079          | Thailand        | KP120895 | rodent sample |
| BRR0191               | <i>Rattus exulans</i>    | <i>L. borgpetersenii</i> | Undesignated | BRR0191          | Thailand        | KP120897 | rodent sample |
| BRR0233               | <i>Rattus exulans</i>    | <i>L. borgpetersenii</i> | Undesignated | BRR0233          | Thailand        | KP120899 | rodent sample |
| BRR0914K              | <i>Bandicota indica</i>  | <i>L. interrogans</i>    | Undesignated | BRR0914K         | Thailand        | KP120903 | rodent sample |
| SSK0842               | <i>Bandicota indica</i>  | <i>L. interrogans</i>    | Undesignated | SSK0842          | Thailand        | KP120907 | rodent sample |
| SSK0854               | <i>Bandicota indica</i>  | <i>L. interrogans</i>    | Undesignated | SSK0854          | Thailand        | KP120910 | rodent sample |
| BRR0078               | <i>Rattus exulans</i>    | <i>L. interrogans</i>    | Undesignated | BRR0078          | Thailand        | KP120894 | rodent sample |
| BRR0126               | <i>Rattus exulans</i>    | <i>L. interrogans</i>    | Undesignated | BRR0126          | Thailand        | KP120896 | rodent sample |
| BRR0227               | <i>Rattus exulans</i>    | <i>L. interrogans</i>    | Undesignated | BRR0227          | Thailand        | KP120898 | rodent sample |
| BRR0242               | <i>Rattus exulans</i>    | <i>L. interrogans</i>    | Undesignated | BRR0242          | Thailand        | KP120900 | rodent sample |
| BRR0250               | <i>Rattus exulans</i>    | <i>L. interrogans</i>    | Undesignated | BRR0250          | Thailand        | KP120901 | rodent sample |
| SSK0807               | <i>Rattus exulans</i>    | <i>L. interrogans</i>    | Undesignated | SSK0807          | Thailand        | KP120905 | rodent sample |
| BRR0260               | <i>Rattus rattus</i>     | <i>L. interrogans</i>    | Undesignated | BRR0260          | Thailand        | KP120902 | rodent sample |
| SSK0827               | <i>Rattus rattus</i>     | <i>L. interrogans</i>    | Undesignated | SSK0827          | Thailand        | KP120906 | rodent sample |
| SSK0845               | <i>Rattus rattus</i>     | <i>L. interrogans</i>    | Undesignated | SSK0845          | Thailand        | KP120908 | rodent sample |
| SSK0850               | <i>Rattus rattus</i>     | <i>L. interrogans</i>    | Undesignated | SSK0850          | Thailand        | KP120909 | rodent sample |
| SSK0967               | <i>Rattus rattus</i>     | <i>L. interrogans</i>    | Undesignated | SSK0967          | Thailand        | KP120911 | rodent sample |
| SUR0922               | <i>Rattus rattus</i>     | <i>L. interrogans</i>    | Undesignated | SUR0922          | Thailand        | KP120912 | rodent sample |
| BRR0914U              | <i>Bandicota indica</i>  | <i>L. wolffii</i>        | Undesignated | BRR0914U         | Thailand        | KP120904 | rodent sample |
